# Supplementary material for: Controlling states of water droplets on nanostructured surfaces by design
Source: Royal Society of Chemistry journal article supplement (doi:10.1039/c7nr06896d), 2017-01-01
Supplement: c7nr06896d1.pdf [file c7nr06896d1.pdf]

## Electronic Supplementary information for

### Controlling States of Water Droplets on Nanostructured Surfaces by Design

Chongqin Zhu<sup>1, 2†</sup>, Yurui Gao<sup>3†</sup>, Yingying Huang<sup>4</sup>, Hui Li<sup>2</sup>, Sheng Meng<sup>5,6</sup>, Joseph S. Francisco<sup>1</sup>,  
Xiao Cheng Zeng<sup>1, 2\*</sup>

The file includes:

Table S1. Calculated probabilities  $P_w$  of the Wenzel state on a surface with a trapezoid base angle of  $\varphi = 45^\circ$ , given different downward velocities  $v_d$  of the droplet and various intrinsic contact angles ( $\theta_{in}$ ).

Table S2. Calculated probabilities  $P_w$  of the Wenzel state on a surface with a trapezoid base angle of  $\varphi = 60^\circ$ , given different downward velocities  $v_d$  of the droplet and various intrinsic contact angles ( $\theta_{in}$ ).

Figure S1. Side and top views of the initial water droplets in MD simulations of a water droplet on a flat surface.

Figure S2. Snapshots of water nanodroplets on flat modelled surfaces at the end of MD simulations with  $\varepsilon$  values varying from 0.289 kJ/mol to 1.544 kJ/mol.

Figure S3. Cosine of the intrinsic contact angle of a water droplet on a modelled surface as a function of the interaction parameter  $\varepsilon$  between a water molecule and an atom of the solid surface.

Figure S4. Variations in potential energy with intrinsic contact angle for water droplets on modelled surfaces with  $\varphi = 45^\circ$  (a),  $\varphi = 60^\circ$  (b),  $\varphi = 90^\circ$  (c) and  $\varphi = 120^\circ$  (d) after equilibrium when the droplet is in the Cassie state in the initial configuration.

Figure S5. Side and top views of the initial configuration with the water droplet in the Wenzel state on a modelled surface with trapezoidal nanostructures.

Figure S6. Enlarged snapshots of systems at  $t = 2.0$  ns after MD simulations with initial configurations with the water droplet in the Wenzel state. The intrinsic contact angles of the surfaces are  $\theta_{in} = 137.7^\circ$  (a) and  $\theta_{in} = 135.9^\circ$  (b), respectively, and the trapezoid base angle is  $\varphi = 120^\circ$ .

Figure S7. Variations in potential energy with intrinsic contact angle for water droplets on modelled surfaces with  $\varphi = 45^\circ$  (a),  $\varphi = 60^\circ$  (b),  $\varphi = 90^\circ$  (c) and  $\varphi = 120^\circ$  (d) after equilibrium when the droplet is in the Wenzel state in the initial configuration.

Figure S8. Snapshots of a water droplet (with 24256 water molecules) in a constrained equilibrium state above the surface (a), in the Cassie state (b), and in the Wenzel state (c) after the droplet has collided with a surface with trapezoidal nanostructures.

Table S1. Calculated probabilities  $P_w$  of the Wenzel state on a surface with a trapezoid base angle of  $\varphi = 45^\circ$ , given different downward velocities  $v_d$  of the droplet and various intrinsic contact angles ( $\theta_{in}$ ).

| $\theta_{in}$<br>(deg) | $v_d$ ( m/s) | $e_k$ (kJ/mol) | Cassie | Wenzel | $P_w$ |
|------------------------|--------------|----------------|--------|--------|-------|
| 60                     | 70           | 0.044          | 100    | 20     | 0.167 |
|                        | 80           | 0.057          | 93     | 27     | 0.225 |
|                        | 90           | 0.073          | 85     | 35     | 0.292 |
|                        | 100          | 0.090          | 47     | 73     | 0.608 |
|                        | 110          | 0.109          | 25     | 95     | 0.792 |
|                        | 120          | 0.129          | 9      | 111    | 0.925 |
| 75                     | 90           | 0.073          | 116    | 4      | 0.033 |
|                        | 100          | 0.090          | 104    | 16     | 0.133 |
|                        | 110          | 0.109          | 92     | 28     | 0.233 |
|                        | 120          | 0.129          | 75     | 45     | 0.375 |
|                        | 130          | 0.152          | 33     | 87     | 0.725 |
|                        | 140          | 0.176          | 7      | 113    | 0.942 |
| 90                     | 120          | 0.129          | 105    | 15     | 0.125 |
|                        | 130          | 0.152          | 90     | 30     | 0.250 |
|                        | 140          | 0.176          | 45     | 75     | 0.625 |
|                        | 145          | 0.189          | 33     | 87     | 0.725 |
|                        | 150          | 0.202          | 18     | 102    | 0.850 |
|                        | 155          | 0.216          | 9      | 111    | 0.925 |
| 105                    | 160          | 0.230          | 5      | 115    | 0.958 |
|                        | 150          | 0.202          | 106    | 14     | 0.117 |
|                        | 160          | 0.230          | 83     | 37     | 0.308 |
|                        | 165          | 0.244          | 73     | 47     | 0.392 |
|                        | 170          | 0.259          | 43     | 77     | 0.642 |
|                        | 175          | 0.275          | 30     | 90     | 0.750 |
| 120                    | 180          | 0.291          | 13     | 107    | 0.892 |
|                        | 190          | 0.324          | 2      | 118    | 0.983 |
|                        | 200          | 0.359          | 112    | 8      | 0.067 |
|                        | 205          | 0.377          | 102    | 18     | 0.150 |
|                        | 210          | 0.396          | 90     | 30     | 0.250 |
|                        | 220          | 0.435          | 56     | 64     | 0.533 |
|                        | 230          | 0.475          | 19     | 101    | 0.842 |
|                        | 235          | 0.496          | 19     | 101    | 0.842 |

Table S2. Calculated probabilities  $P_w$  of the Wenzel state on a surface with a trapezoid base angle of  $\varphi = 60^\circ$ , given different downward velocities  $v_d$  of the droplet and various intrinsic contact angles ( $\theta_{in}$ ).

| $\theta_{in}$ (deg) | $v_d$ (m/s) | $e_k$ (kJ/mol) | Cassie | Wenzel | $P_w$ |
|---------------------|-------------|----------------|--------|--------|-------|
| 90                  | 86          | 0.066          | 112    | 8      | 0.067 |
|                     | 94          | 0.079          | 110    | 10     | 0.083 |
|                     | 102         | 0.093          | 102    | 18     | 0.150 |
|                     | 110         | 0.109          | 86     | 34     | 0.283 |
|                     | 118         | 0.125          | 59     | 61     | 0.508 |
|                     | 126         | 0.143          | 37     | 83     | 0.692 |
| 100                 | 142         | 0.181          | 116    | 4      | 0.033 |
|                     | 150         | 0.202          | 111    | 9      | 0.075 |
|                     | 158         | 0.224          | 94     | 26     | 0.217 |
|                     | 166         | 0.247          | 79     | 41     | 0.342 |
|                     | 174         | 0.272          | 60     | 60     | 0.500 |
|                     | 182         | 0.297          | 24     | 96     | 0.800 |
| 110                 | 142         | 0.181          | 116    | 4      | 0.033 |
|                     | 150         | 0.202          | 111    | 9      | 0.075 |
|                     | 158         | 0.224          | 94     | 26     | 0.217 |
|                     | 166         | 0.247          | 79     | 41     | 0.342 |
|                     | 174         | 0.272          | 60     | 60     | 0.500 |
|                     | 182         | 0.297          | 24     | 96     | 0.800 |
|                     | 190         | 0.324          | 9      | 111    | 0.925 |

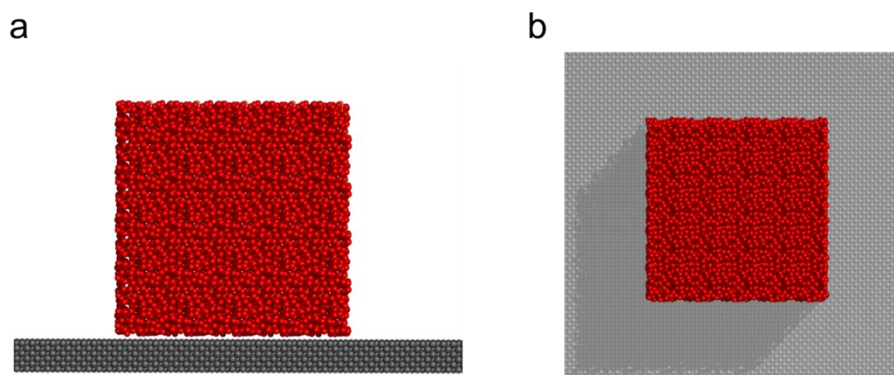

Figure S1. Side and top views of the initial water droplets in MD simulations of a water droplet on a flat surface.

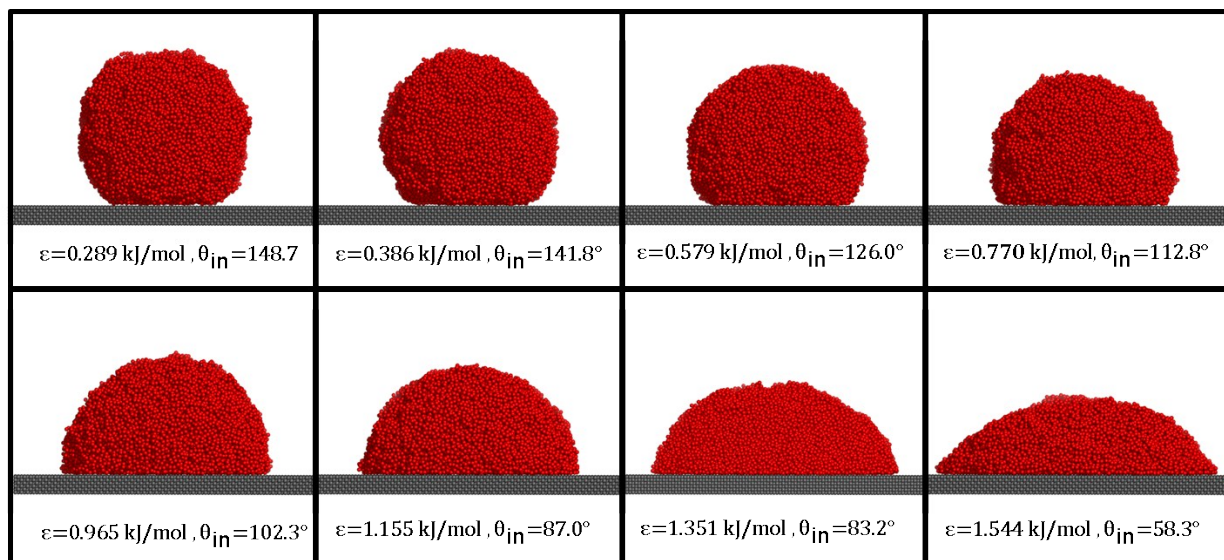

Figure S2. Snapshots of water nanodroplets on flat modelled surfaces at the end of MD simulations with  $\epsilon$  values varying from 0.289 kJ/mol to 1.544 kJ/mol.

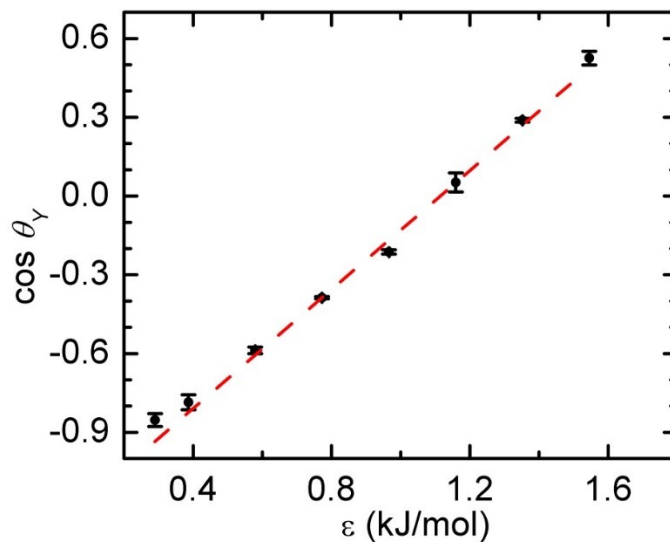

Figure S3. Cosine of the intrinsic contact angle of a water droplet on a modelled surface as a function of the interaction parameter  $\varepsilon$  between a water molecule and an atom of the solid surface.

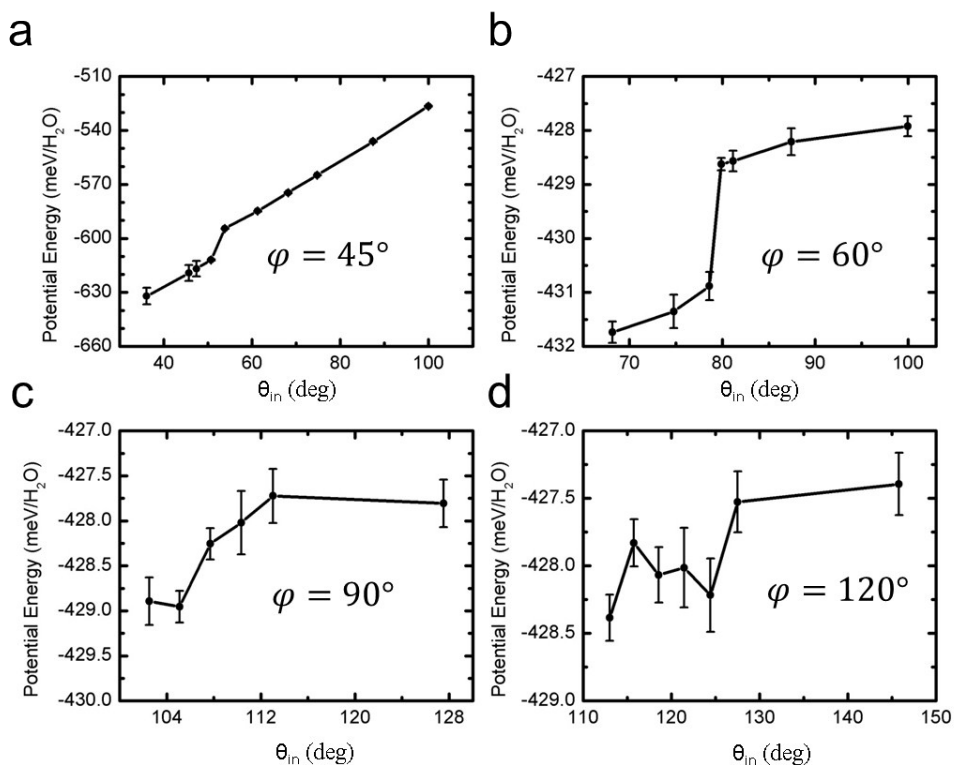

Figure S4. Variations in potential energy (which includes both water-water interaction energy and water-surface interaction energy) with intrinsic contact angle for water droplets on modelled surfaces with  $\varphi = 45^\circ$  (a),  $\varphi = 60^\circ$  (b),  $\varphi = 90^\circ$  (c) and  $\varphi = 120^\circ$  (d) after equilibrium when the droplet is in the Cassie state in the initial configuration.

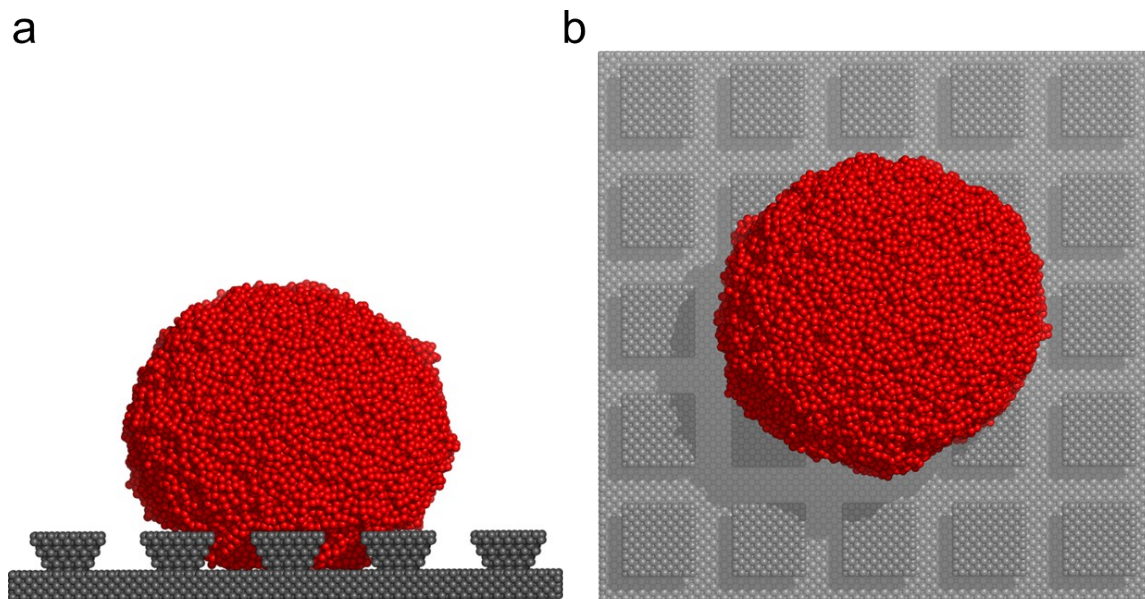

Figure S5. Side and top views of the initial configuration with the water droplet in the Wenzel state on a modelled surface with trapezoidal nanostructures.

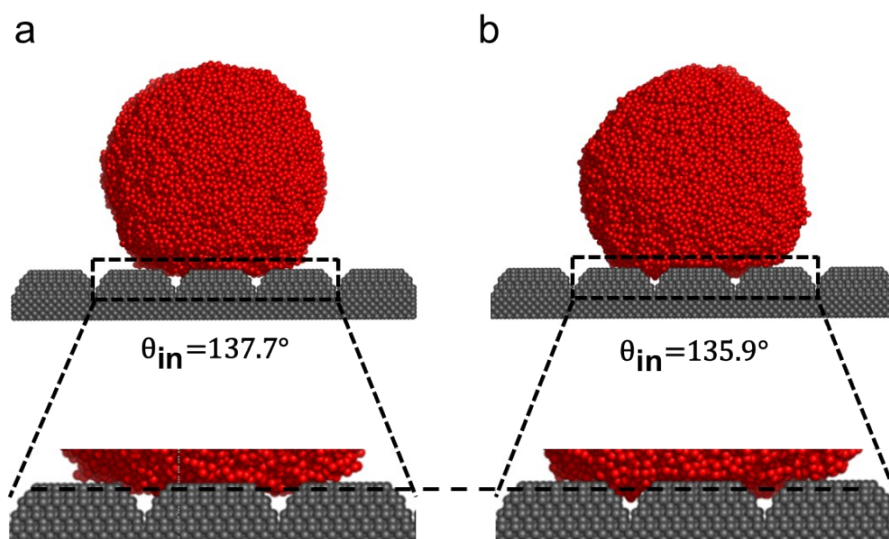

Figure S6. Enlarged snapshots of systems at  $t = 2.0$  ns after MD simulations with initial configurations with the water droplet in the Wenzel state. The intrinsic contact angles of the surfaces are  $\theta_{in} = 137.7^\circ$  (a) and  $\theta_{in} = 135.9^\circ$  (b), respectively, and the trapezoid base angle is  $\varphi = 120^\circ$ .

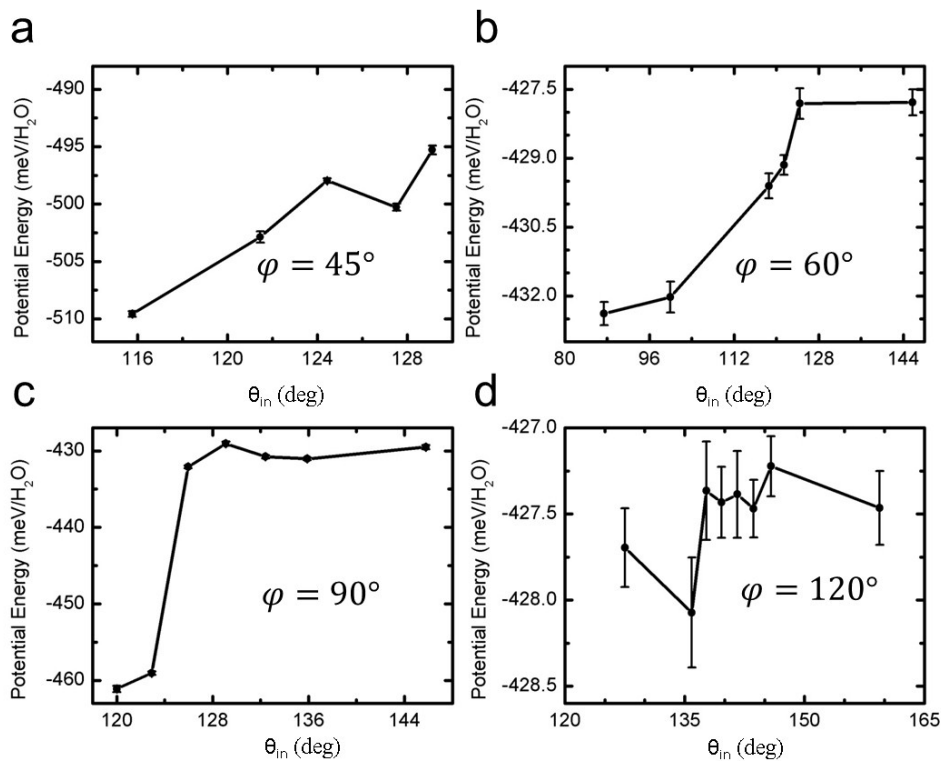

Figure S7. Variations in potential energy with intrinsic contact angle for water droplets on modelled surfaces with  $\varphi = 45^\circ$  (a),  $\varphi = 60^\circ$  (b),  $\varphi = 90^\circ$  (c) and  $\varphi = 120^\circ$  (d) after equilibrium when the droplet is in the Wenzel state in the initial configuration.

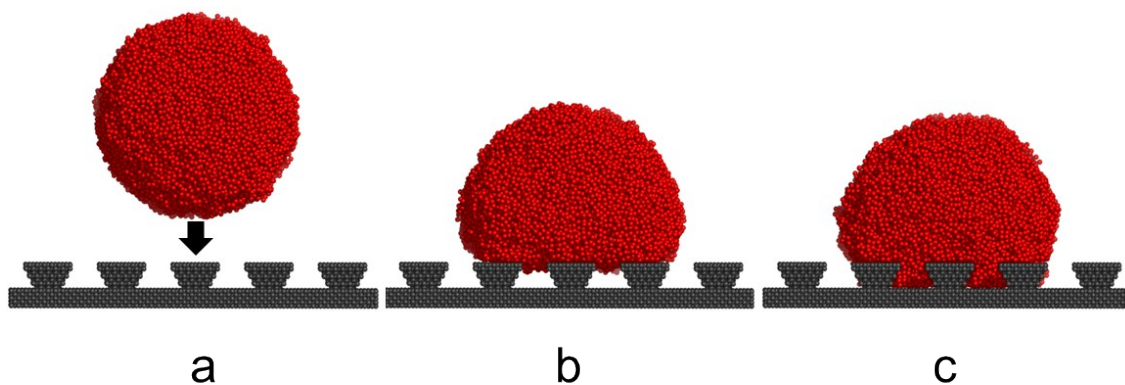

Figure S8. Snapshots of a water droplet (with 24256 water molecules) in a constrained equilibrium state above the surface (a), in the Cassie state (b), and in the Wenzel state (c) after the droplet has collided with a surface with trapezoidal nanostructures.



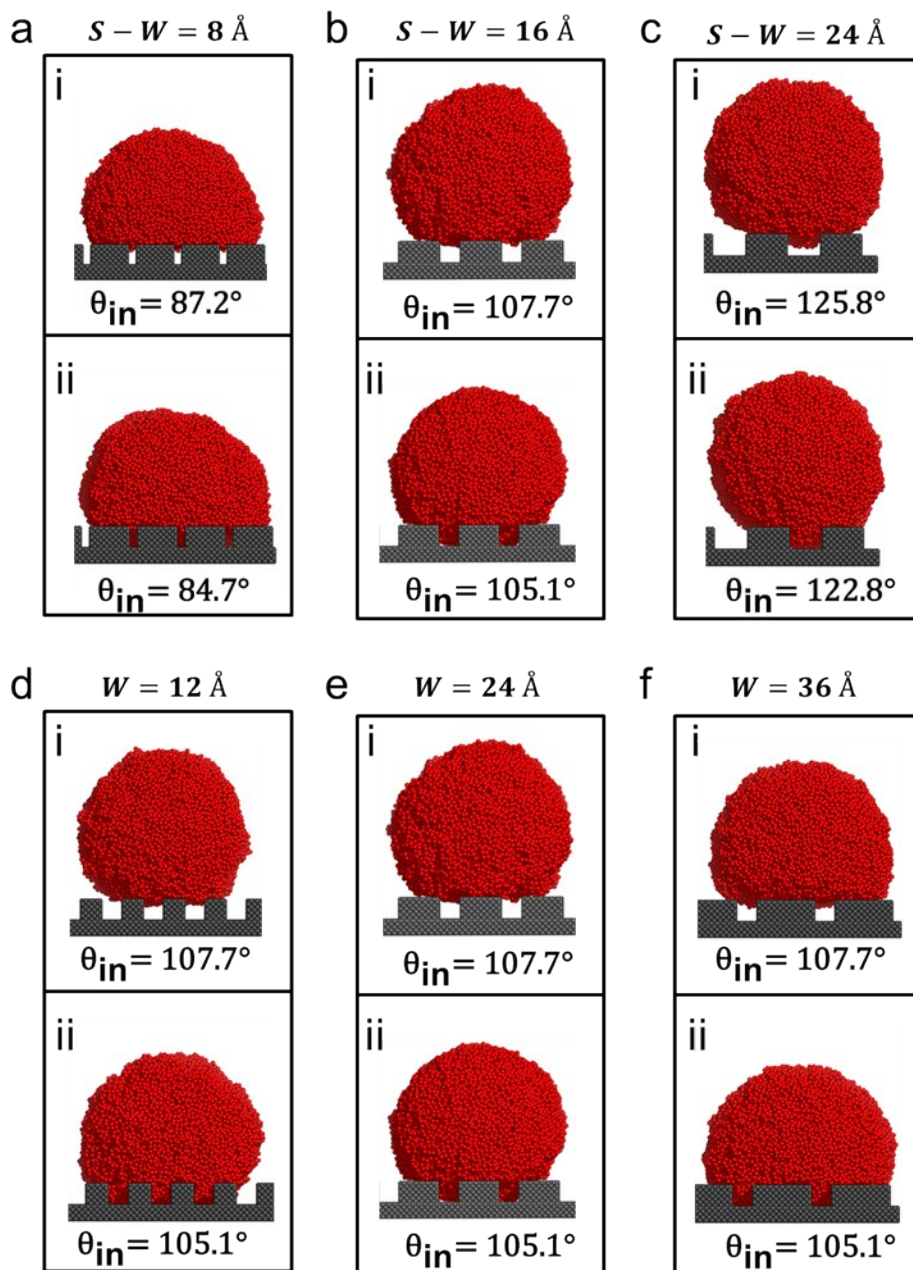

Figure S9. Snapshots of systems at  $t = 2.0$  ns from MD simulations with fixed  $W = 24 \text{ \AA}$  (a, b and c) and fixed  $S-W = 16 \text{ \AA}$  (d, e and f). The intrinsic contact angle of the surface,  $\theta_{in}$ , is shown below each snapshot. Trapezoid base angle is fixed at  $\varphi = 90^\circ$ . For  $W = 24 \text{ \AA}$ , three different  $S-W$  values, i.e.,  $S-W = 8 \text{ \AA}$  (a),  $S-W = 16 \text{ \AA}$  (b), and  $S-W = 24 \text{ \AA}$  (c) were selected for the MD simulations. While for  $S-W = 16 \text{ \AA}$ , three  $W$  values, i.e.,  $W = 12 \text{ \AA}$  (d),  $W = 24 \text{ \AA}$  (e),  $W = 36 \text{ \AA}$  (a) were selected for the MD simulations.
